# Supplementary material for: Tislelizumab for Relapsed/Refractory Classical Hodgkin Lymphoma: 3-Year Follow-up and Correlative Biomarker Analysis
Source: PubMed Central journal article supplement — Clin Cancer Res. 2022 Mar 14;28(6):1147–56. doi: 10.1158/1078-0432.CCR-21-2023 (PMC9365351; doi:10.1158/1078-0432.ccr-21-2023), 2022-03-14
Supplement: ccr-21-2023_suppdata.pdf [file ccr-21-2023_suppdata.pdf]

### 3-year follow-up of tislelizumab for R/R cHL Song *et al.*

#### Supplementary Data

**Supplemental Table 1. Baseline characteristics and clinical outcomes of overall, GEP-evaluable, and mIHC-evaluable populations.**

| Variable                                           | Overall population<br>(N=70) | GEP-evaluable population<br>(N=36) | mIHC-evaluable population<br>(N=41) |
|----------------------------------------------------|------------------------------|------------------------------------|-------------------------------------|
| Median age, years (range)                          | 32.5 (18–69)                 | 33.0 (19–69)                       | 33.0 (19–67)                        |
| Age group, n (%)                                   |                              |                                    |                                     |
| <65 years                                          | 66 (94.3)                    | 32 (88.9)                          | 38 (92.7)                           |
| ≥65 years                                          | 4 (5.7)                      | 4 (11.1)                           | 3 (7.3)                             |
| Sex, n (%)                                         |                              |                                    |                                     |
| Male                                               | 40 (57.1)                    | 20 (55.6)                          | 26 (63.4)                           |
| Female                                             | 30 (42.9)                    | 16 (44.4)                          | 15 (36.6)                           |
| ECOG performance status, n (%)                     |                              |                                    |                                     |
| 0                                                  | 48 (68.6)                    | 25 (69.4)                          | 30 (73.2)                           |
| 1                                                  | 22 (31.4)                    | 11 (30.6)                          | 11 (26.8)                           |
| Stage IV at study entry, n (%)                     | 42 (60)                      | 25 (69.4)                          | 26 (63.4)                           |
| Bulky disease, <sup>a</sup> n (%)                  | 8 (11.4)                     | 2 (5.6)                            | 3 (7.3)                             |
| Bone marrow involvement, n (%)                     | 22 (31.4)                    | 13 (36.1)                          | 13 (31.7)                           |
| B-symptom(s), n (%)                                | 26 (37.1)                    | 15 (41.7)                          | 13 (31.7)                           |
| Histology subtype, n (%)                           |                              |                                    |                                     |
| Nodular sclerosis                                  | 42 (60)                      | 20 (55.6)                          | 21 (51.2)                           |
| Mixed cellularity                                  | 19 (27.1)                    | 11 (30.6)                          | 14 (34.1)                           |
| Lymphocyte-rich                                    | 3 (4.3)                      | 3 (8.3)                            | 2 (4.9)                             |
| Unspecified                                        | 6 (8.6)                      | 2 (5.6)                            | 4 (9.8)                             |
| Median time from initial diagnosis, months (IQR)   | 25.33 (12.91–40.54)          | 22.51 (13.11–38.87)                | 26.81 (12.88–40.54)                 |
| Median number of lines of prior therapy, n (range) | 3.00 (2.0–11.0)              | 3.00 (2.0–9.0)                     | 3.00 (2.0–11.0)                     |
| Types of prior systemic therapy, n (%)             |                              |                                    |                                     |
| Chemotherapy                                       | 70 (100.0)                   | 36 (100.0)                         | 41 (100.0)                          |
| ASCT                                               | 13 (18.6)                    | 8 (22.2)                           | 9 (22.0)                            |
| Immunotherapy <sup>b</sup>                         | 15 (21.4)                    | 6 (16.7)                           | 6 (14.6)                            |
| Ineligible for prior ASCT <sup>c</sup> , n (%)     | 57 (81.4)                    | 28 (77.8)                          | 32 (78.0)                           |
| Patients with prior radiation therapy, n (%)       | 21 (30.0)                    | 11 (30.6)                          | 13 (31.7)                           |
| Best response, n (%)                               |                              |                                    |                                     |
| Overall response                                   | 61 (87.1)                    | 30 (83.3)                          | 37 (90.2)                           |
| Complete response                                  | 47 (67.1)                    | 23 (63.9)                          | 29 (70.7)                           |

<sup>a</sup> Bulky disease defined as size of any single node/nodal mass ≥10 cm in diameter or mediastinal mass ratio of ≥0.33.

- <sup>b</sup> Immunotherapy includes brentuximab-vedotin, rituximab, CIK cell transfusion, thalidomide and lenalidomide.
- <sup>c</sup> Patients were ineligible for ASCT if they did not achieve at least a partial response to salvage chemotherapy, were  $\geq 65$  years of age, had contraindicating comorbidities, or due to the failure or inability to collect hematopoietic stem cells. All received  $\geq 2$  prior regimens.

ASCT, autologous hematopoietic stem cell transplant; CIK, cytokine induced killer; ECOG, Eastern Cooperative Oncology Group; GEP, gene expression profiling; IQR, interquartile range; mIHC, multiplexed immunohistochemistry.

**Supplemental Table 2. Gene list showing genes associated with progression-free survival by univariate Cox regression analysis.**

| <b>Genes associated with prolonged PFS<sup>a</sup></b> | <b>Genes associated with disease progression<sup>a</sup></b> |
|--------------------------------------------------------|--------------------------------------------------------------|
| <i>IFNL3</i>                                           | <i>IL32</i>                                                  |
| <i>IL1A</i>                                            | <i>IL6R</i>                                                  |
| <i>IL1R1</i>                                           | <i>IL6ST</i>                                                 |
| <i>IL4</i>                                             | <i>CSF2RB</i>                                                |
| <i>CCL11</i>                                           | <i>IRF2</i>                                                  |
| <i>CCR10</i>                                           | <i>IRF8</i>                                                  |
| <i>IL9</i>                                             | <i>IRF1</i>                                                  |
| <i>CXCL8</i>                                           | <i>IRF3</i>                                                  |
| <i>PDCD1LG2</i>                                        | <i>IRF9</i>                                                  |
| <i>FCGR1A</i>                                          | <i>IFNAR2</i>                                                |
| <i>TNFSF9</i>                                          | <i>CD19</i>                                                  |
| <i>TNFRSF21</i>                                        | <i>CD48</i>                                                  |
| <i>SI00A12</i>                                         | <i>CD79B</i>                                                 |
| <i>SI00A9</i>                                          | <i>CD22</i>                                                  |
| <i>SI00A8</i>                                          | <i>CD27</i>                                                  |
| <i>VEGFA</i>                                           | <i>CD72</i>                                                  |
| <i>LAMC3</i>                                           | <i>CD38</i>                                                  |
| <i>ITGAM</i>                                           | <i>CD96</i>                                                  |
| <i>CPE</i>                                             | <i>CD247</i>                                                 |
| <i>SPINK1</i>                                          | <i>ATF2</i>                                                  |
| <i>MYOF</i>                                            | <i>RNF4</i>                                                  |
| <i>CEACAM5</i>                                         | <i>OAZ1</i>                                                  |
| <i>ACKR3</i>                                           | <i>TUBB</i>                                                  |
| <i>TEX14</i>                                           | <i>BTLA</i>                                                  |
| <i>ANXA1</i>                                           | <i>NCL</i>                                                   |
| <i>TP63</i>                                            | <i>HIST1H2BH</i>                                             |
| <i>CD14</i>                                            | <i>TRAT1</i>                                                 |
| <i>SLC11A1</i>                                         | <i>PSMB8</i>                                                 |
| <i>PYGL</i>                                            | <i>TMPO</i>                                                  |
| <i>SLC2A1</i>                                          | <i>NLRC5</i>                                                 |
| <i>DPYSL4</i>                                          | <i>SLAMF1</i>                                                |
| <i>PPM1E</i>                                           | <i>PTPRC</i>                                                 |
| <i>KRT16</i>                                           | <i>SP100</i>                                                 |
| <i>AADAT</i>                                           | <i>STAT1</i>                                                 |
| <i>ALCAM</i>                                           | <i>PSMB9</i>                                                 |
| <i>ABL2</i>                                            | <i>TAGAP</i>                                                 |
| <i>LRP1</i>                                            | <i>FYN</i>                                                   |
| <i>CLEC5A</i>                                          | <i>RPL6</i>                                                  |
| <i>CREB5</i>                                           | <i>MOB3A</i>                                                 |
| <i>HK2</i>                                             | <i>ISG20</i>                                                 |
| <i>ITGB3</i>                                           | <i>CEP55</i>                                                 |
| <i>MMP11</i>                                           | <i>SPIB</i>                                                  |
| <i>OLR1</i>                                            | <i>TXLNA</i>                                                 |

*HK1*  
*SNAI2*  
*PTGER3*  
*MYO1B*  
*KIR.panS*  
*CTAG2*  
*PLAUR*  
*PLAU*  
*MSR1*  
*MSH3*  
*CCDC138*  
*CD1A*  
*FAM161A*  
*HEYL*  
*LEXM*  
*MYO5C*  
*TAL1*  
*DST*  
*IGFBP3*  
*DSE*

*HLA.F*  
*SEMA4D*  
*ETS1*  
*PIK3CD*  
*SELPLG*  
*SLAMF6*  
*HLA.C*  
*NFKB2*  
*PSMB10*  
*HLA.E*  
*TAP2*  
*DOCK9*  
*CD6*  
*FYB1*  
*ST6GAL1*  
*PDHB*  
*ARHGD1B*  
*JAK1*  
*ITK*  
*ADGRE5*  
*TAP1*  
*CARD11*  
*CORO1A*  
*CCND3*  
*TNFRSF13C*  
*RPL38*  
*CD3D*  
*CREBBP*  
*SELL*  
*CSK*  
*PTPRCAP*  
*IKZF3*  
*MYBL2*  
*CASP4*  
*GBP5*  
*EP300*  
*ITGAL*  
*CD3G*  
*LCK*  
*LRBA*  
*TNFAIP8*  
*CD3E*  
*ITGB7*  
*CD2*

---

<sup>a</sup> Genes with Wald test p value < 0.05 in the univariate analysis.

**Supplemental Figure 1. Maximum change from baseline in the SPD of target lesions for all patients.** Percentage change in SPD was presented as the best response achieved in each patient. CR, complete response; PD, progressive disease; PR, partial response; SD, stable disease; SPD, sum of products of diameters.

**Supplemental Figure 2. Associations of CD8+ T cells, CD68+ macrophages, FcγRI+ cells, and FcγRI+ macrophages with clinical responses.** (A) CD8 T-cell infiltration by mIHC in complete responders versus non-responders. (B) Macrophages marked by CD68 by mIHC in complete responders versus non-responders. (C) Total FcγRI+ expression by mIHC in complete responders versus non-responders. (D) FcγRI+ macrophages by mIHC in complete responders versus non-responders. mIHC, multiplexed immunohistochemistry.

**Supplemental Figure 3. Correlation of Fc $\gamma$ RI+ expression with IFNG and IL10. (A)**

*In vitro* results showing that Fc $\gamma$ RI+ expression was induced by IFN-r and IL10. (B)

Correlation of FcGR1A with IFNG mRNA in the 36 GEP-evaluable patients. (C) Correlation of FcGR1A with IL10 mRNA in the 36 GEP-evaluable patients. GEP, gene expression profiling; IFN, interferon; IL, interleukin; MFI, mean fluorescence intensity; NS, non-stimulation.
